# Supplementary material for: Heating-up synthesis of cesium bismuth bromide perovskite nanocrystals with tailored composition, morphology, and optical properties
Source: Royal Society of Chemistry journal article supplement (doi:10.1039/c9ra10106c), 2020-01-01
Supplement: c9ra10106c1.pdf [file c9ra10106c1.pdf]

Supporting Information for

**Heating-Up Synthesis of Cesium Bismuth Bromide**

**Perovskite Nanocrystals with Tailored**

**Composition, Morphology, and Optical Properties**

Donguk Lee,<sup>a</sup> MinHye Kim,<sup>a</sup> Ho-Young Woo,<sup>a</sup> Jiyeon Chae,<sup>a</sup> Dawon Lee,<sup>a</sup> Sanghyun  
Jeon,<sup>b</sup> Soong Ju Oh,<sup>\*b</sup> and Taejong Paik<sup>\*a</sup>

a. Department of Integrative Engineering, Chung-Ang University, Seoul 06974, Republic of  
Korea

b. Department of Materials Science and Engineering, Korea University, Seoul 02841, Republic of  
Korea

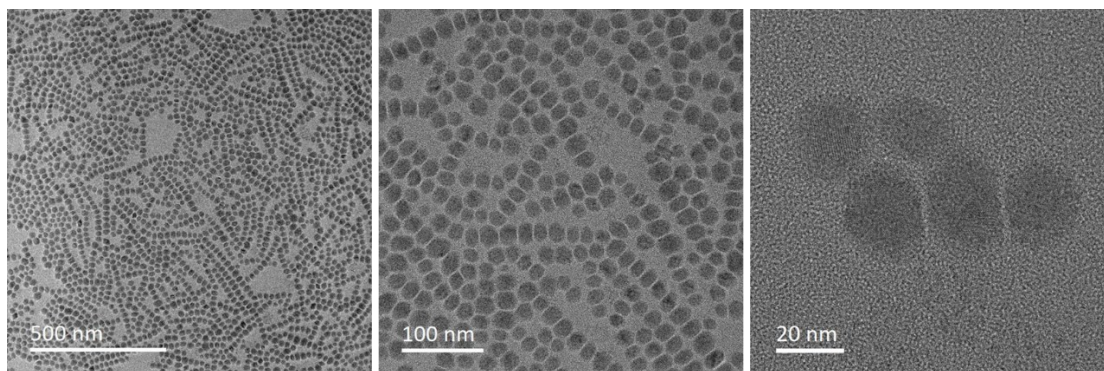

**Fig. S1** TEM images of Cs<sub>3</sub>BiBr<sub>6</sub> NCs.

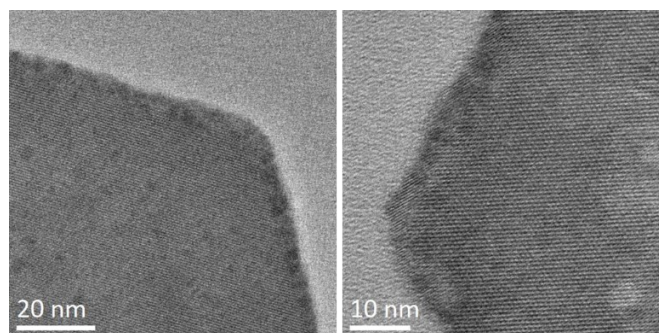

**Fig. S2** High resolution TEM images of Cs<sub>3</sub>Bi<sub>2</sub>Br<sub>9</sub> NPs.

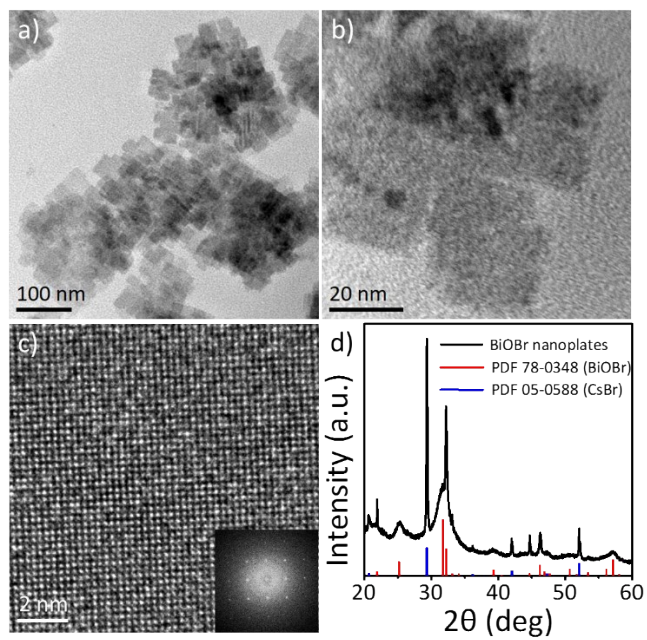

**Fig. S3** a,b) TEM and c) HRTEM images of BiOBr nanoplates. d) XRD patterns of BiOBr nanoplates.

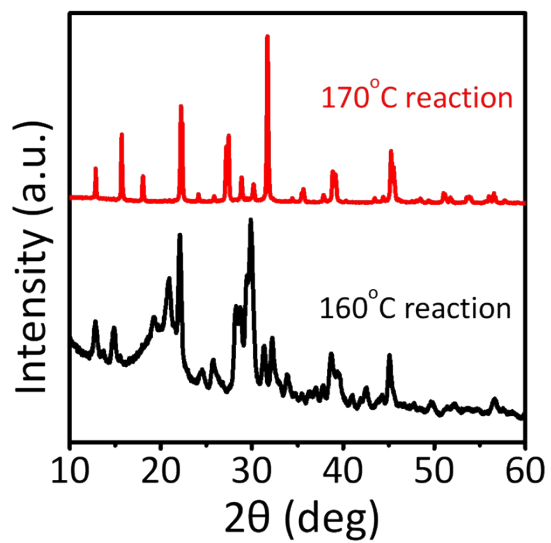

**Fig. S4** XRD patterns of perovskite NCs synthesized at 160 °C and 170 °C for 1 h in the presence of 1.5 mL of OA.

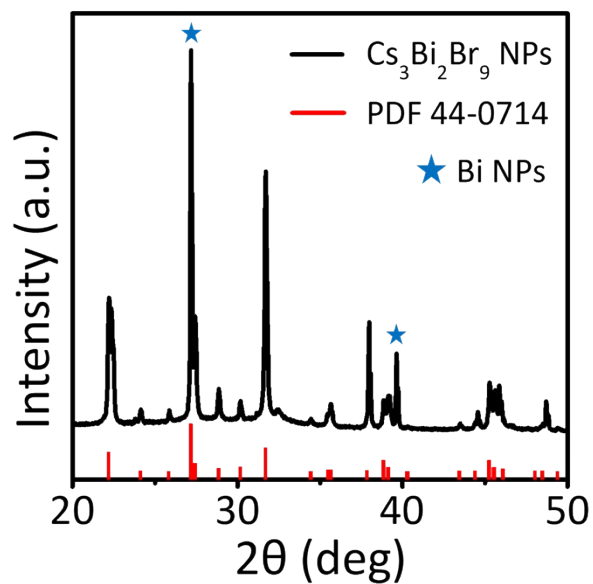

**Fig S5.** XRD patterns of sample synthesized at 200 °C for 1 h in the presence of 1.5 mL of OA.

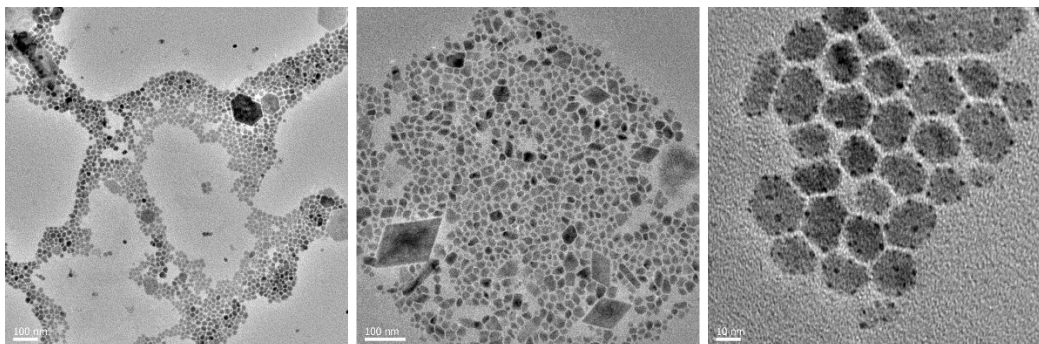

**Fig. S6** TEM images of small Cs<sub>3</sub>Bi<sub>2</sub>Br<sub>9</sub> NCs synthesized at 100 °C for 30 min with 15 mL of OA.

| Sample                                              | $\alpha_1$ (%) | $\tau_1$ (ns) | $\alpha_2$ (%) | $\tau_2$ (ns) | $\tau_{ave}$ (ns) | $\chi^2$ |
|-----------------------------------------------------|----------------|---------------|----------------|---------------|-------------------|----------|
| Cs <sub>3</sub> BiBr <sub>6</sub> NCs               | 46.62          | 4.24          | 24.14          | 12.63         | 2.63              | 1.18     |
| Cs <sub>3</sub> Bi <sub>2</sub> Br <sub>9</sub> NPs | 40.19          | 2.77          | 26.35          | 12.16         | 1.52              | 0.94     |

**Table S1.** Photoluminescence decay fitting results; the decay curves are fitted according to bi-exponential functions.
